# Supplementary material for: Genomic and Transcriptomic Analysis of Pea (Pisum sativum L.) Breeding Line ‘Triumph’ with High Symbiotic Responsivity
Source: MDPI journal article supplement (doi:10.3390/plants13010078), 2023-12-26
Supplement: s1 [file s1]

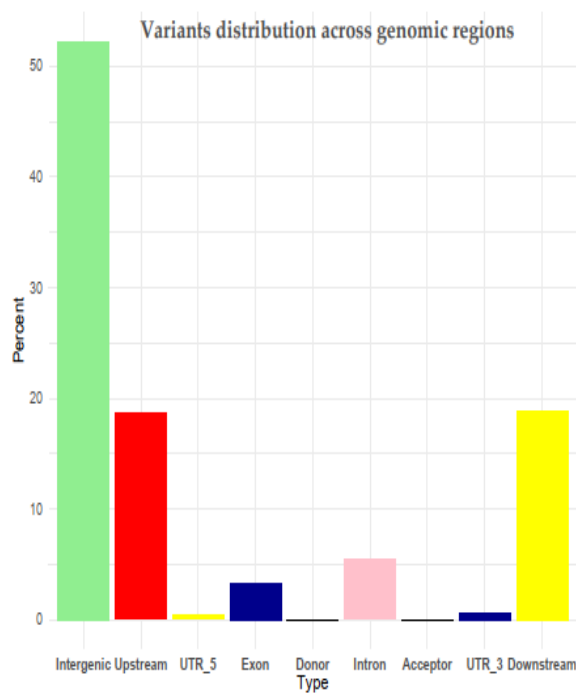

**Figure S1.** Variants distribution across genomic regions.

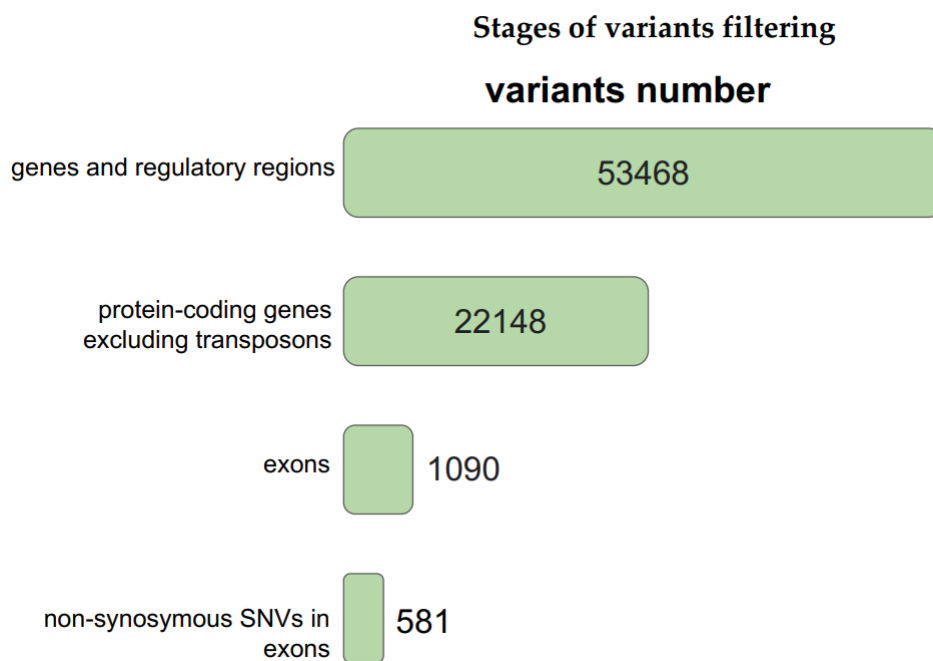

**Figure S2.** Stages of variants filtering.

### GO enrichment analysis of genes with indels that are common for Triumph and Vendevil

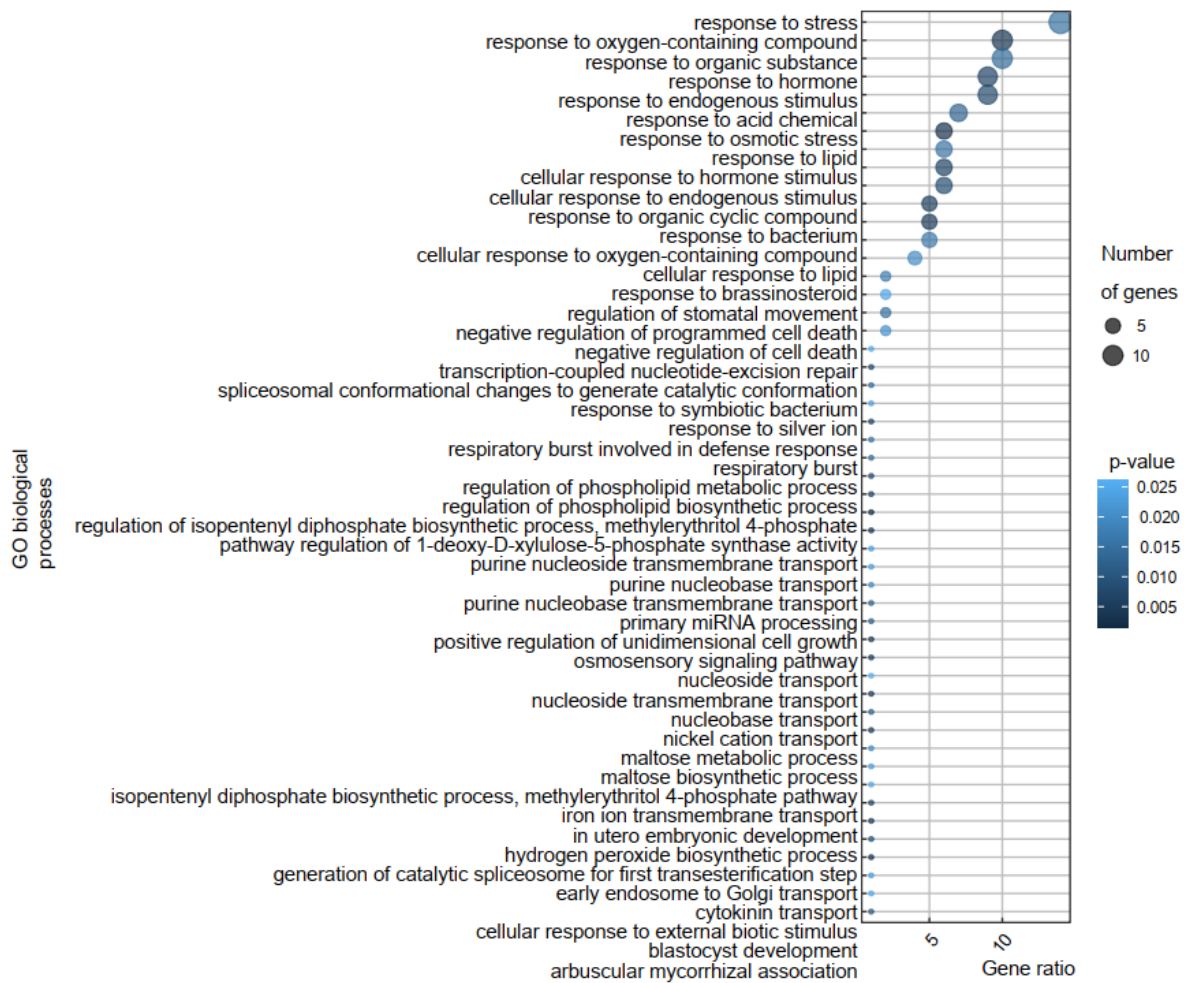

**Figure S3.** GO enrichment analysis of genes with indels that are common for 'Triumph' and 'Vendevil'.

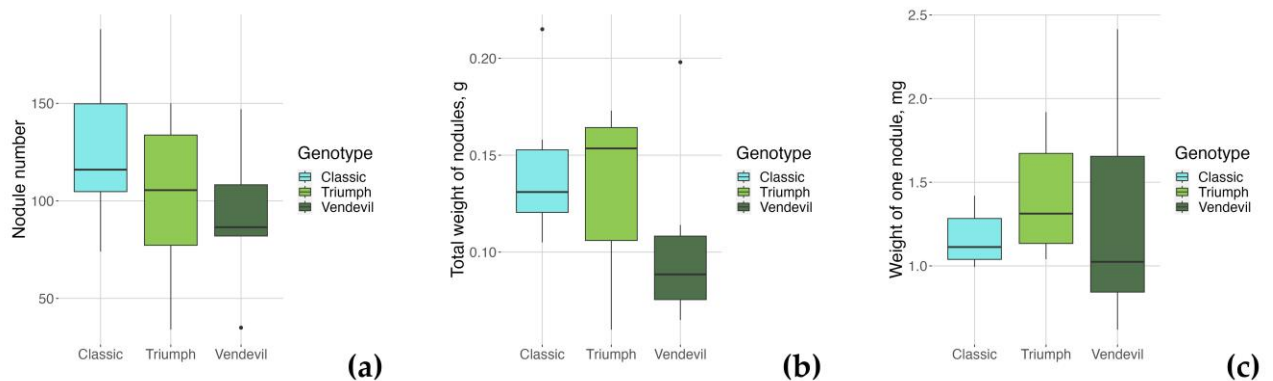

**Figure S4.** Nodule number and nodule weight across genotypes.

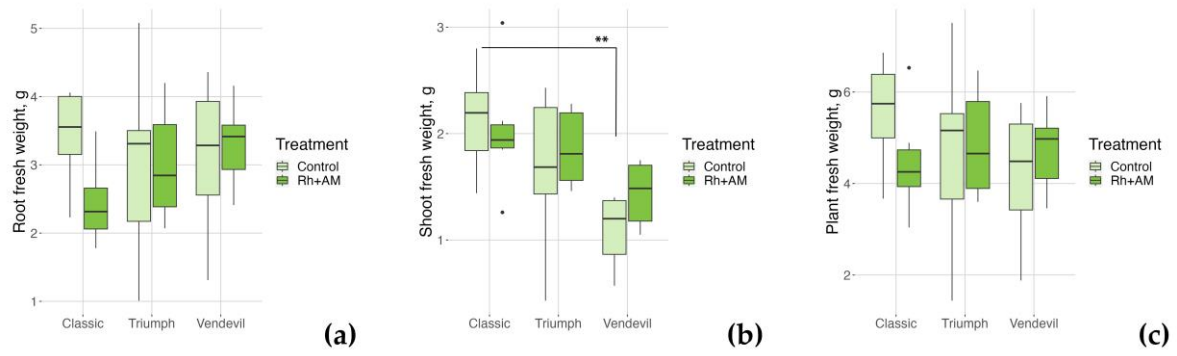

**Figure S5.** Fresh weight of different plant's parts across genotypes.

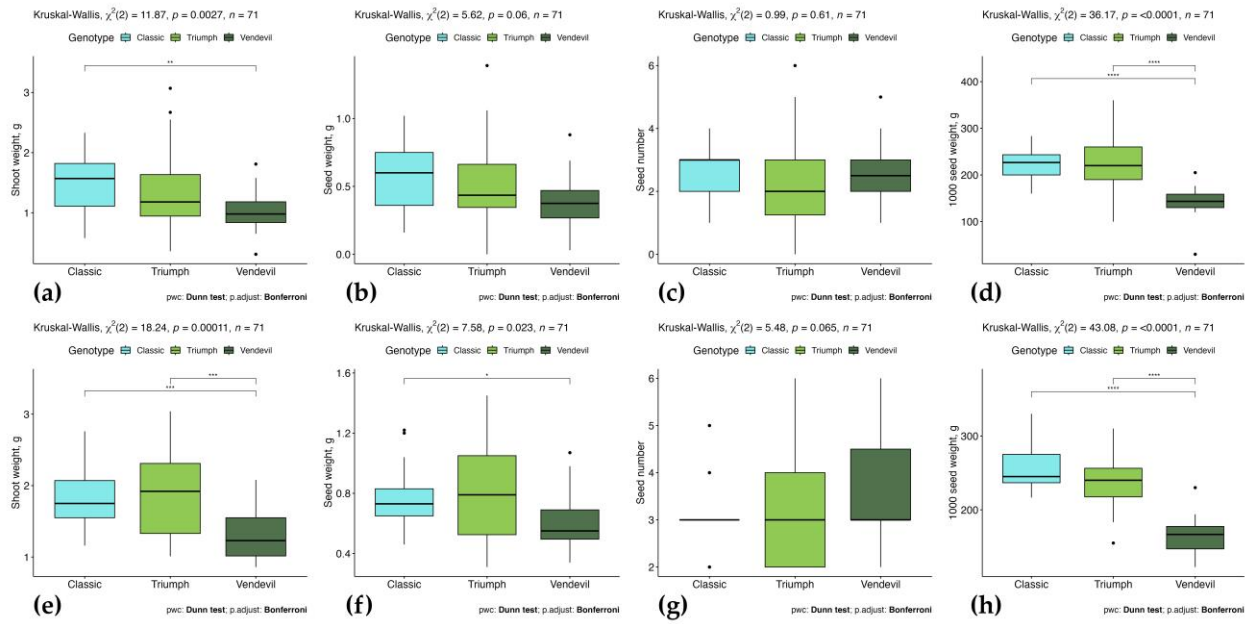

**Figure S6.** Shoot weight, seed weight and seed number across genotypes.

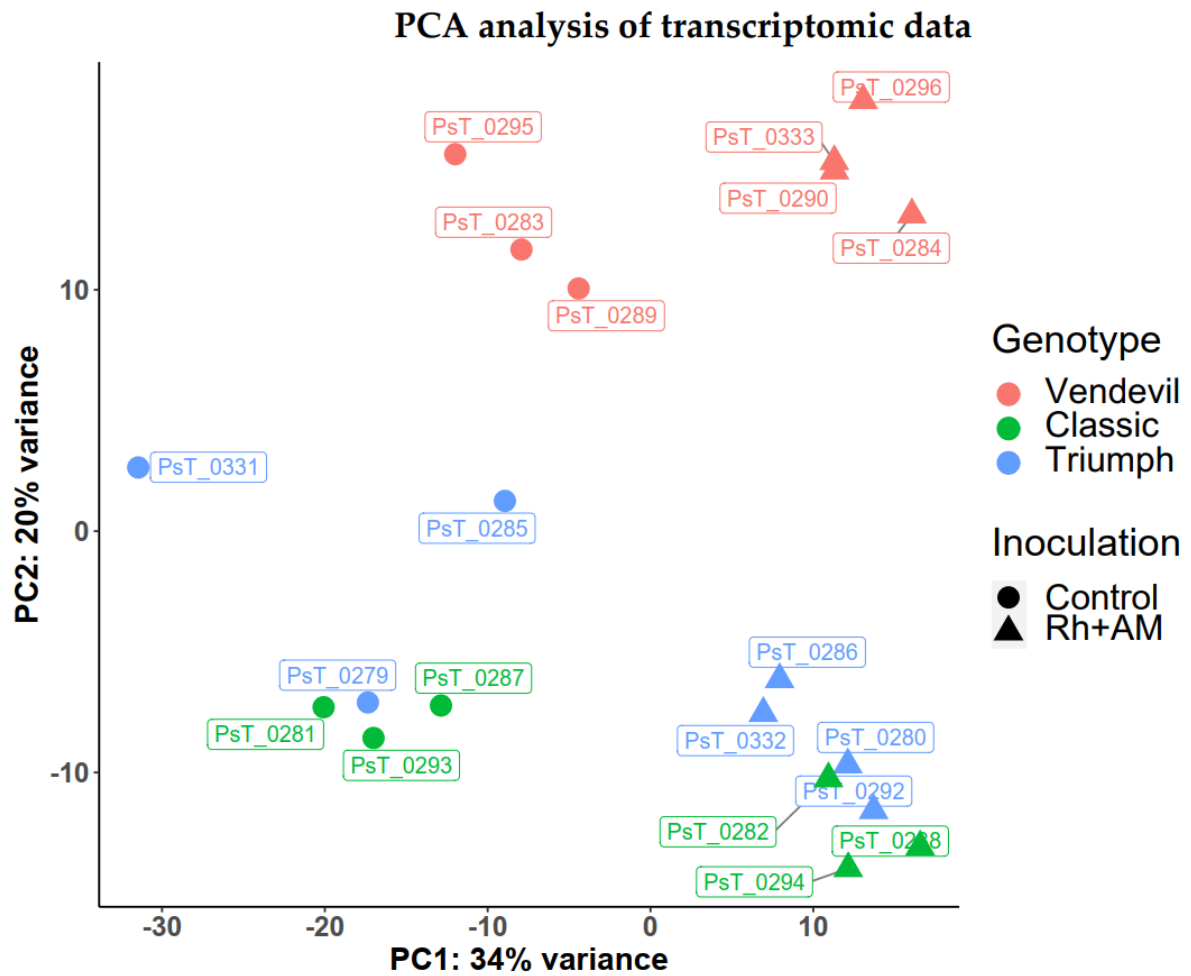

Figure S7. PCA analysis of transcriptomic data.

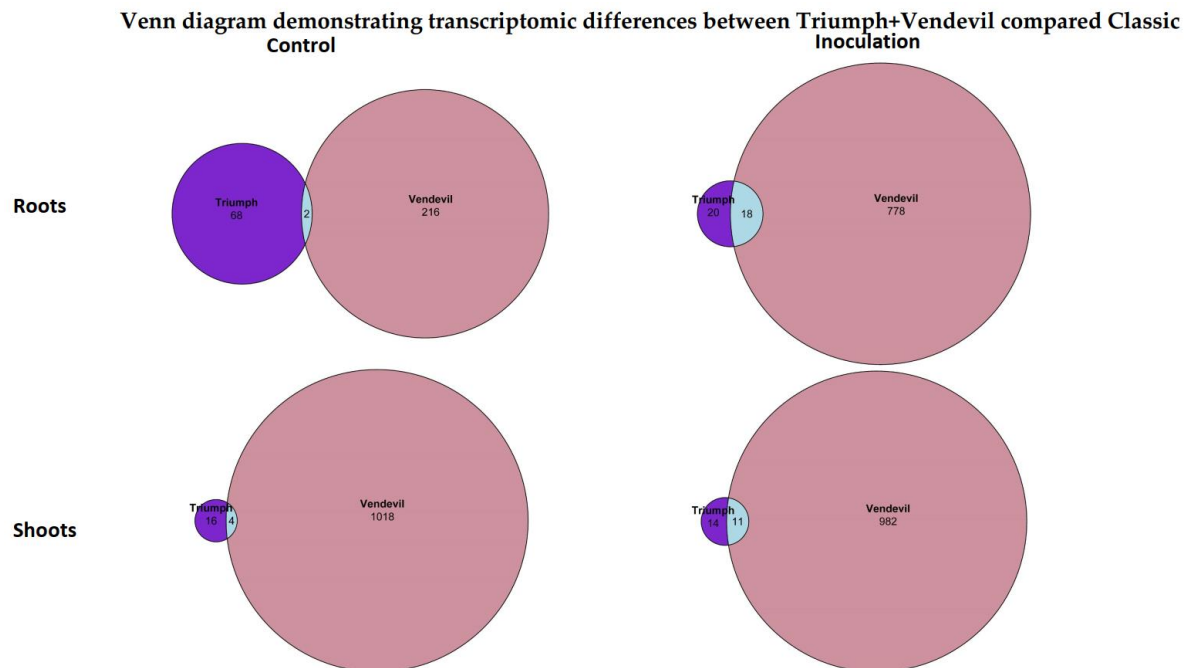

Figure S8. Venn diagram demonstrating transcriptomic differences between 'Triumph' and 'Vendevil' compared to 'Classic'.

### Expression analysis of *M. truncatula*'s homolog of *PsGLP2* obtained using MtGEA

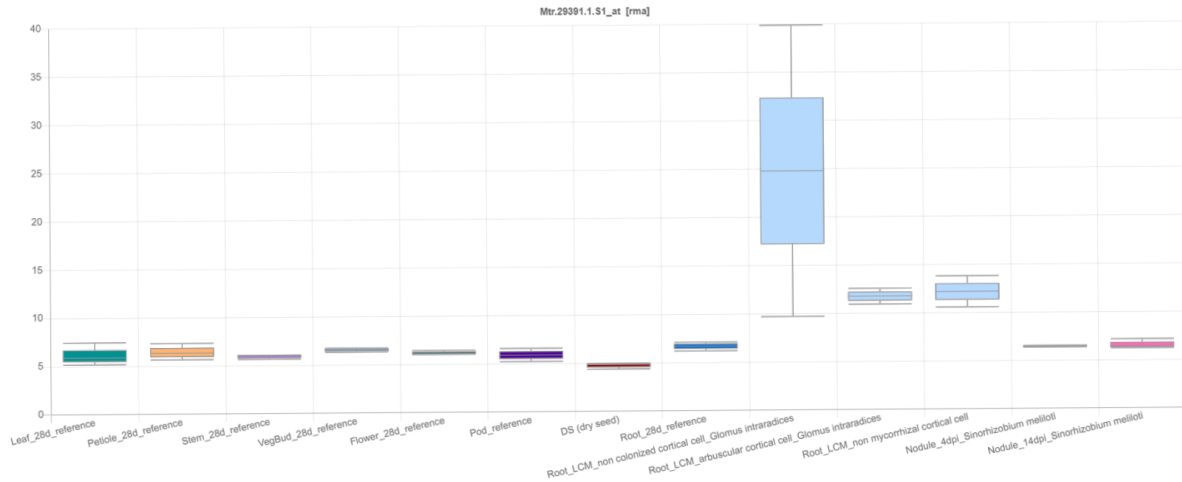

**Figure S9.** Expression analysis of *M. truncatula*'s homolog of *PsGLP2* obtained using MtGEA.

### A phylogenetic tree constructed based on the alignment of the sequence of genes encoding germin-like proteins and rhicadhesin receptors in *P. sativum* and *M. truncatula*.

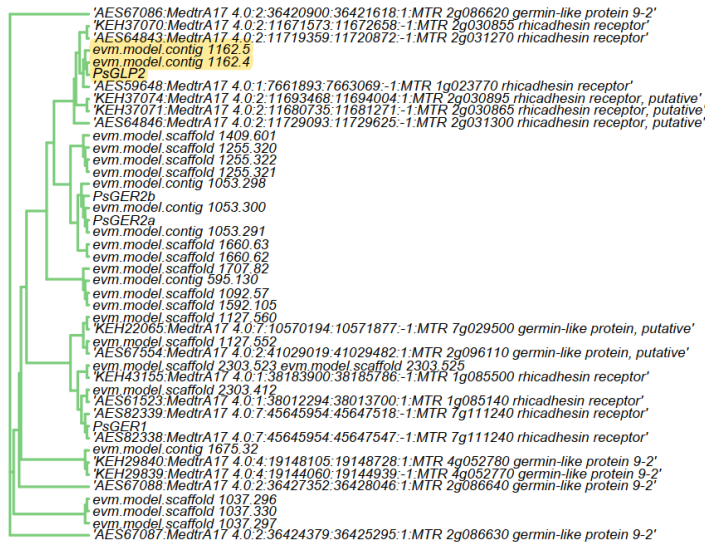

**Figure S10.** A phylogenetic tree constructed based on the alignment of the sequence of genes encoding germin-like proteins and rhicadhesin receptors in *P. sativum* and *M. truncatula*.

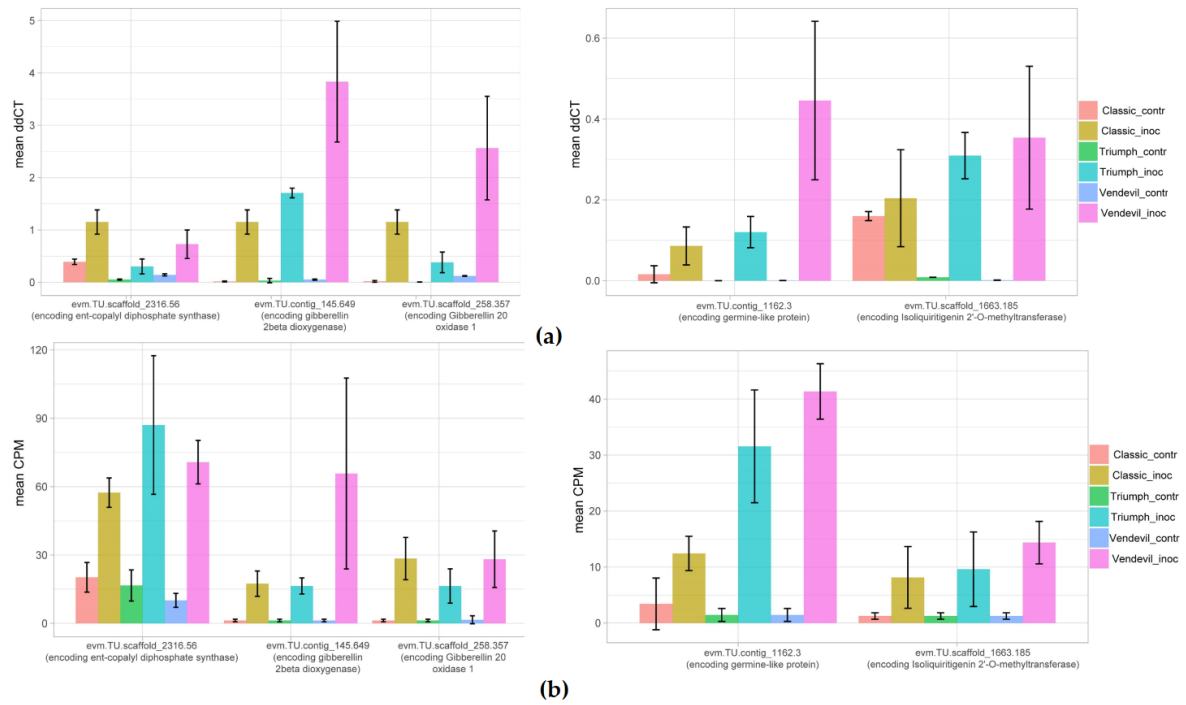

**Figure S11.** Results of qRT-PCR analysis and comparison with transcriptomic data.
