# Supplementary material for: Genomic and Transcriptomic Analysis of Pea (Pisum sativum L.) Breeding Line ‘Triumph’ with High Symbiotic Responsivity
Source: Plants (Basel). 2023 Dec 26;13(1):78. doi: 10.3390/plants13010078 (PMC10781049; doi:10.3390/plants13010078)
Supplement: Supplementary file 1 [file plants-13-00078-s001.zip]

Archive with 7 entries (7 files):
- plants-2747820-supplementary Figures.pdf
- Table S1 - Reads processing description.xlsx
- Table S2 -  Common up-regulated DEGs in Classic, Triumph and Vendevil.xlsx
- Table S3 - Down-regulated DEGs in response to double inoculation.xlsx
- Table S4 - Common up-regulated DEGs in response to double inoculation in Triumph and Vendevil.xlsx
- Table S5 - Common DEGs in Triumph and Vendevil compared to Classic.xlsx
- Table S6 - List of primers for qRT-PCR validation of transcriptomic data.xlsx
