# Supplementary material for: Genomic and Transcriptomic Analysis of Pea (Pisum sativum L.) Breeding Line ‘Triumph’ with High Symbiotic Responsivity
Source: Plants (Basel). 2023 Dec 26;13(1):78. doi: 10.3390/plants13010078 (PMC10781049; doi:10.3390/plants13010078)
Supplement: Supplementary file 1 [file plants-13-00078-s001.zip › Table S6 - List of primers for qRT-PCR validation of transcriptomic data.xlsx]

## Sheet: List of primers for qRT-PCR
Primer_ID	Sequence	Function
PsGLP2_F1	GGGAACTCAGTATGCAAAGATCC	germin-like protein
PsGLP2_R1	GAGCCAAGGAGATTCCAAGTG	germin-like protein
PsIMTL_F1	GAAGAAGGTGGGAGTGAAAGAG	Isoliquiritigenin 2'-O-methyltransferase
PsIMTL_R1	CCTTGTCACAATTCGATAGTACC	Isoliquiritigenin 2'-O-methyltransferase
GA2_dioxi_F1	CCACAGAACACCGTCCCAACTT	Gibberellin 2beta dioxygenase
GA2_dioxi_R1	TGTGCTCAGCATCATGATACCCT	Gibberellin 2beta dioxygenase
GA20_oxi_F1	ATTTCCACCAGGGATGAGTGAGG	Gibberellin 20 oxidase 1
GA20_oxi_R1	GCATCATTGCTCCAAACCTGAACTA	Gibberellin 20 oxidase 1
Ent_cop_F1	TTCTCCACCCACTTTCATCTTCCA	ent-copalyl diphosphate synthase
Ent_cop_R1	GCAACCCAAGCAGTATCATAAGCAG	ent-copalyl diphosphate synthase
